# Supplementary material
Source: PubMed Central journal article supplement (PMC3216358)

**Supplementary Table 1** ddPCR data on the detection of *BRAF* V600E mutant DNA in wildtype DNA background.

| Target mutant fraction (%) | Mutant (FAM Channel)    |                         |                 | Wildtype (VIC Channel)  |                         |                 | Measured mutant fraction (%) | Low (%;95% CI) | High (%;95% CI) |
|----------------------------|-------------------------|-------------------------|-----------------|-------------------------|-------------------------|-----------------|------------------------------|----------------|-----------------|
|                            | Positive droplet counts | Negative droplet counts | Copies detected | Positive droplet counts | Negative droplet counts | Copies detected |                              |                |                 |
| 0                          | 0                       | 104683                  | 0               | 103934                  | 749                     | 517129          | 0                            | 0              | 0               |
| 0.001                      | 6                       | 104533                  | 6               | 103641                  | 898                     | 497307          | 0.0012                       | 0.0002         | 0.0022          |
| 0.005                      | 24                      | 108165                  | 24              | 107244                  | 945                     | 512865          | 0.0047                       | 0.0028         | 0.0066          |
| 0.01                       | 39                      | 104895                  | 39              | 104016                  | 918                     | 497271          | 0.0078                       | 0.0054         | 0.0103          |
| 0.1                        | 361                     | 103856                  | 362             | 102806                  | 1411                    | 448360          | 0.0807                       | 0.0723         | 0.0890          |
| 1.0                        | 3770                    | 98637                   | 3841            | 101652                  | 755                     | 502818          | 0.7639                       | 0.7372         | 0.7907          |

**Supplementary Figure 1** Plot of target mutant fraction vs. measured mutant fraction for *BRAF* V600E in wildtype DNA background. Error bars indicate the Poisson 95% confidence intervals.

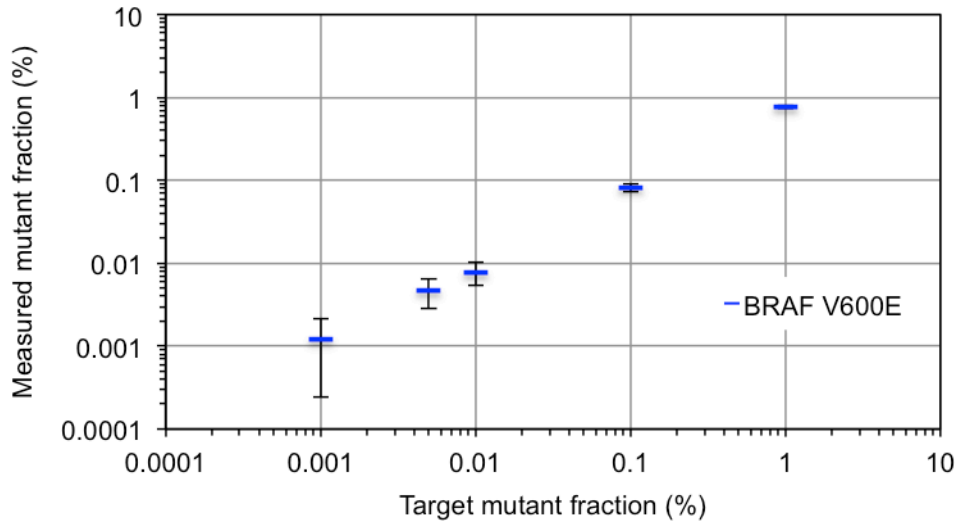

Supplement: ac202028g_si_001.pdf [file ac202028g_si_001.pdf]
